# Supplementary material for: Computerized history-taking improves data quality for clinical decision-making—Comparison of EHR and computer-acquired history data in patients with chest pain
Source: PubMed Central journal article supplement (PMC8476015; doi:10.1371/journal.pone.0257677), 2021-09-27

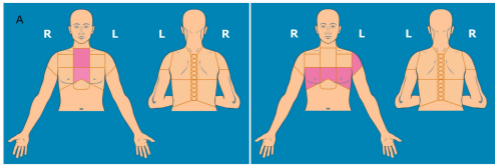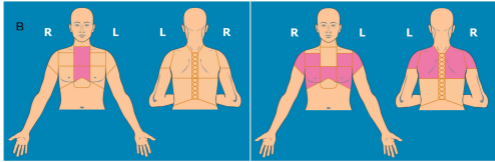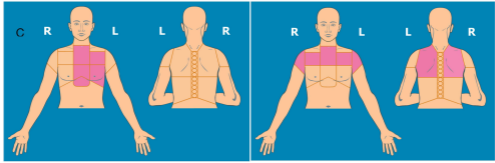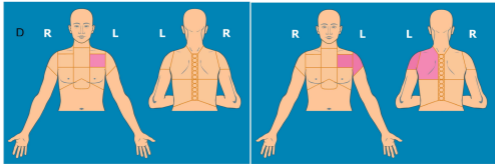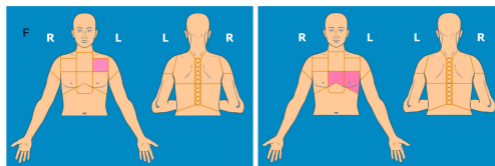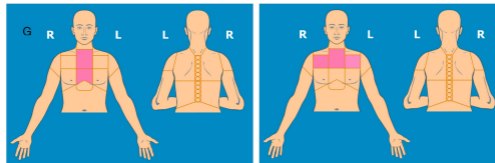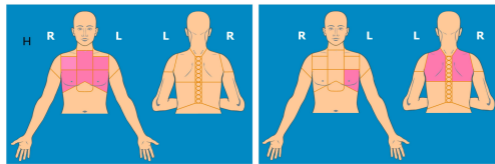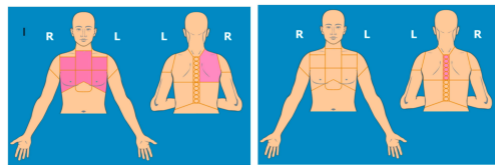

Supplement: pone.0257677.s002.pdf [file pone.0257677.s002.pdf]
